# Supplementary material for: Bubble casting soft robotics
Source: Springer Nature journal article supplement (doi:10.1038/s41586-021-04029-6), 2021-11-10
Supplement: 41586_2021_4029_MOESM1_ESM.pdf [file 41586_2021_4029_MOESM1_ESM.pdf]

**Supplementary information**

---

**Bubble casting soft robotics**

---

In the format provided by the  
authors and unedited

# Supporting Information: Bubble Casting Soft Robotics

Trevor J. Jones,<sup>1</sup> Etienne Jambon-Puillet,<sup>1</sup> Joel Marthelot,<sup>1</sup> P.-T. Brun,<sup>1\*</sup>

<sup>1</sup>Department of Chemical and Biological Engineering, Princeton University, Princeton, NJ 08540, USA

\*To whom correspondence should be addressed; E-mail: pbrun@princeton.edu.

**In this supplementary document we provide the derivation of the flow equations predicting (S1) the fluid deposition on the wall following bubble injection and (S2) the film thickness from gravitational drainage.**

# S1 Bretherton's Problem

We leverage the large literature on the displacement of bubbles in channels [1, 2, 3, 4, 5] to rationalize the thickness  $h_i$  of polymer melt left on the tubular mold wall after the bubble injection. Below we present two ways of obtaining Eq. 1 of the main text using either scaling arguments [4] or lubrication theory [5].

## S1.1 Scaling

As the bubble progresses with a velocity  $U$ , the melt viscous drag near the wall results in the deposition of a film of constant thickness  $h_i$ . This deposition deforms the liquid-air interface such that capillary forces resist the motion. A transition region of length  $\lambda$  appears between the thin film and the bubble front whose curvature is  $2/R$  with  $R$  the tube radius. Balancing viscous and capillary forces in the transition region yields:  $\mu U/h_i^2 \sim \gamma/R\lambda$ , with  $\mu$  the viscosity of the liquid film. The transition length  $\lambda$  is found by matching the curvature of the bubble front with the one in the transition region  $2/R \sim 1/R + h_i/\lambda^2$ . Replacing  $\lambda$  and rearranging provides the classic Bretherton's Law:

$$\frac{h_i}{R} \sim \text{Ca}^{2/3}. \quad (\text{S1})$$

At high capillary number  $\text{Ca} = \mu U/\gamma$ , the film becomes thick and the assumption that the bubble front curvature is  $2/R$  breaks down. Using the better approximation  $2/(R - h_i)$  for the curvature changes the force balance to  $\mu U/h_i^2 \sim \gamma/(R - h_i)\lambda$  and the transition length to  $\lambda \sim \sqrt{(R - h_i)h_i}$ . Rearranging gives the functional form:

$$\frac{h_i}{R} \sim \frac{\text{Ca}^{2/3}}{1 + \text{Ca}^{2/3}}. \quad (\text{S2})$$

Using Eq. S2 Aussillous and Quéré justified the empirical fit for Bretherton's Problem at moderate capillary number [4]:

$$\frac{h_i}{R} = \frac{1.34\text{Ca}^{2/3}}{1 + 1.34 \cdot 2.5\text{Ca}^{2/3}}. \quad (\text{S3})$$

## S1.2 Theory

An extended Bretherton's model by Klaseboer et al. [5] provides a rigorous derivation of Eq. S3. Because the film thickness  $h(z)$  is small compared to the tube radius  $R$ , we can use the lubrication approximation which simplify the Navier-Stokes Equations to  $\frac{dp}{dz} = \mu \frac{d^2 u}{dr^2}$ . Here,  $u(r)$  is the velocity profile in the liquid film, in the frame

of the moving bubble and  $p(z)$  is the pressure. Using the no slip (wall moving at  $u(0) = -U$ ) and shear-free ( $du/dr|_{r=h} = 0$ ) boundary conditions allow us to recover the velocity:

$$u(r) = \frac{1}{\mu} \frac{dp}{dz} \left( \frac{r^2}{2} - rh \right) - U. \quad (\text{S4})$$

Mass conservation imposes that the flux in any section along the film must be constant and equal to  $Q = -Uh_i$  such that:

$$\int_0^{h(z)} u(r) dr = -\frac{h(z)^3}{3\mu} \frac{dp}{dz} - Uh(z) = -Uh_i. \quad (\text{S5})$$

Eq. S5 relate the pressure gradient in the film to its thickness:  $\frac{dp}{dz} = -3\mu U \frac{h(z)-h_i}{h(z)^3}$ . The pressure in the thin film is given by Laplace's law:  $p(z) = -\gamma \frac{d^2h}{dz^2} - \frac{\gamma}{R-h_i} + P_{\text{air}}$ . Differentiating the pressure and replacing it in the equation for the thickness yields:

$$\gamma \frac{d^3h}{dz^3} = 3\mu U \frac{h - h_i}{h^3}, \quad (\text{S6})$$

which is the Landau-Levich Equation  $\frac{d^3\bar{h}}{d\bar{z}^3} = \frac{\bar{h}-1}{\bar{h}^3}$  after rescaling the height  $h = h_i\bar{h}$  and axial length  $z = h_i(3\text{Ca})^{-1/3}\bar{z}$ . The Landau-Levich Equation has no known analytic solutions but posses two asymptotic solutions that match the geometry of the problem. First, as  $z \rightarrow -\infty$  the thickness approaches the final thickness such that  $\bar{h} = 1$  ( $h = h_i$ ). Second, as  $z \rightarrow \infty$  then  $h \gg h_i$  such that Eq. S6 simplifies to  $d^3h/dz^3 = 0$ . Integrating twice gives:

$$h(z) = \frac{1}{2h_i} (3\text{Ca})^{2/3} C_1 (z - z_0)^2 + h_i C_2. \quad (\text{S7})$$

Equation S7 is a parabolic approximation of a sphere with curvature  $C_1(3\text{Ca})^{2/3}/h_i$  whose apex is at  $z_0$ . With a bubble front curvature  $2/R_b$  one could match the curvatures and rearrange to arrive at:

$$\frac{h_i}{R_b} = C_1(3\text{Ca})^{2/3}. \quad (\text{S8})$$

Note that Eq. S8 has the same form as Eq. S1. The prefactors were calculated by Bretherton [3] and found to be  $C_1 = 0.643$  and  $C_2 = 2.79$ . The difference with Eq. S1 lies in the bubble front curvature  $R_b$  which is found by matching the transition region to the bubble nose [5] at the matching point  $z_0$ :  $h(z_0) = h_i C_2 = R - R_b$ .

Combining this with Eq. S8 and rearranging recovers Eq. 1:

$$\frac{h_i}{R} = \frac{1.34\text{Ca}^{2/3}}{1 + 1.34C_2\text{Ca}^{2/3}}. \quad (\text{S9})$$

The small discrepancy between the calculated and fitted value of  $C_2$  is discussed in [5] and was attributed to the matching leading to Eq. S7 being done at  $\bar{h} \rightarrow \infty$  rather than the large but finite experimental value.

## S2 Film drainage of Newtonian fluids

Here, we describe how the drainage of the annulus of thickness  $h_i$  left by the bubble forms the upper membrane of our actuators.

We introduce the cylindrical coordinates  $\{r, \psi, z\}$ , assume that the Reynold's number is low (since we deal with viscous fluids), and that the film is thin  $\delta = h_i/R \ll 1$  which allows us to use the lubrication approximation. Assuming no flow in the  $z$  direction, the Navier-Stokes equations simplifies to:

$$0 = -\frac{\partial p}{\partial r} - \rho g \cos \psi, \quad (\text{S10a})$$

$$0 = -\frac{1}{r} \frac{\partial p}{\partial \psi} + \rho g \sin \psi + \mu \left( \frac{\partial}{\partial r} \left[ \frac{1}{r} \frac{\partial(ru)}{\partial r} \right] + \frac{1}{r^2} \frac{\partial u^2}{\partial \psi^2} \right), \quad (\text{S10b})$$

with  $u(r, \psi)$  the fluid velocity and  $p(r, \psi)$  the pressure.

The pressure at the liquid-air interface is the Laplace pressure:  $p(r = R - h, \psi) = P_{\text{air}} - \gamma \kappa$  where  $\gamma$  is the surface tension, and  $\kappa$  is the interface curvature. Integrating Eq. S10a gives the pressure in the fluid:  $p(r, \psi) = P_{\text{air}} - \gamma \kappa + \rho g(R - r - h) \cos \psi$ . Under the assumption  $\delta \ll 1$ , introducing the change of coordinates  $\bar{r} = R - r$  and keeping first-order terms greatly simplifies Eq. S10b to [6]

$$\frac{\partial^2 u}{\partial \bar{r}^2} = -\frac{\gamma}{\mu R} \frac{\partial \kappa}{\partial \psi} + \frac{\rho g}{\mu R} \frac{\partial h}{\partial \psi} \cos \psi - \frac{\rho g}{\mu} \sin \psi. \quad (\text{S11})$$

Integrating Eq. S11 twice with no-slip boundary condition  $u(\bar{r} = 0) = 0$  at the solid-liquid interface and zero-shear stress  $\partial u / \partial \bar{r} |_{\bar{r}=h} = 0$  at the air-liquid interface yields the tangential velocity:

$$u(\bar{r}, \psi) = \left( \frac{\gamma}{\mu R} \frac{\partial \kappa}{\partial \psi} - \frac{\rho g}{\mu R} \frac{\partial h}{\partial \psi} \cos \psi + \frac{\rho g}{\mu} \sin \psi \right) \left( h\bar{r} - \frac{\bar{r}^2}{2} \right). \quad (\text{S12})$$

From the velocity, we compute the volumetric flow rate  $Q = \int_0^h u(\bar{r}, \psi) d\bar{r}$ . Using mass conservation in cylindrical coordinates  $\partial h / \partial t + R^{-1} \partial Q / \partial \psi = 0$ , we eventually obtain the lubrication equation:

$$\frac{\partial h}{\partial t} + \frac{1}{3\mu R} \frac{\partial}{\partial \psi} \left[ h^3 \left( \underbrace{\frac{\gamma}{R} \frac{\partial \kappa}{\partial \psi}}_{\text{I}} - \underbrace{\frac{\rho g}{R} \frac{\partial h}{\partial \psi} \cos \psi}_{\text{II}} + \underbrace{\rho g \sin \psi}_{\text{III}} \right) \right] = 0. \quad (\text{S13})$$

Where the leading order curvature derivative term is  $\frac{\partial \kappa}{\partial \psi} = (\frac{\partial^3 h}{\partial \psi^3} + \frac{\partial h}{\partial \psi}) / R^2$ . In the spatial variation of the flux, term **I** corresponds to the surface tension effects, term **II** corresponds to the hydrostatic pressure distribution, and term **III** corresponds to the gravitational drainage.

The lubrication equation can be nondimensionalized by rescaling the height by the initial film thickness  $h = h_i \hat{h}$  and the time by the initial drainage time  $t = \tau_d^* \hat{t}$  (see Eq. 8 in Methods section 'Timescale separation'). The new equation reads:

$$\frac{\partial \hat{h}}{\partial \hat{t}} + \frac{1}{3} \frac{\partial}{\partial \psi} \left[ \hat{h}^3 \left( \frac{\delta^2}{\text{Bo}} \left( \frac{\partial^3 \hat{h}}{\partial \psi^3} + \frac{\partial \hat{h}}{\partial \psi} \right) - \delta \frac{\partial \hat{h}}{\partial \psi} \cos \psi + \sin \psi \right) \right] = 0, \quad (\text{S14})$$

where  $\text{Bo} = \rho g h_i R / \gamma$  is a modified Bond number.

Keeping first order terms in Eq. S14, we obtain the zeroth order solution (which is the exact solution at the apex)  $\hat{h}(\hat{t}) = (1 + 2\hat{t}/3)^{-1/2}$  which can be simplified to  $\hat{h}(\hat{t}) = \sqrt{3/(2\hat{t})}$  at late time  $t \gg \tau_d^*$  [6] or in dimensional form:

$$h(t) = \sqrt{\frac{3\mu R}{2\rho g t}}. \quad (\text{S15})$$

## References

- [1] Fred Fairbrother and Alfred E Stubbs. 119. studies in electro-endosmosis. part vi. the “bubble-tube” method of measurement. *Journal of the Chemical Society (Resumed)*, pages 527–529, 1935.
- [2] GI Taylor. Deposition of a viscous fluid on the wall of a tube. *Journal of Fluid Mechanics*, 10(2):161–165, 1961.
- [3] Francis Patton Bretherton. The motion of long bubbles in tubes. *Journal of Fluid Mechanics*, 10(2):166–188, 1961.
- [4] Pascale Aussillous and David Quéré. Quick deposition of a fluid on the wall of a tube. *Physics of fluids*, 12(10):2367–2371, 2000.
- [5] Evert Klaseboer, Raghvendra Gupta, and Rogerio Manica. An extended bretherton model for long taylor bubbles at moderate capillary numbers. *Physics of Fluids*, 26(3):032107, 2014.
- [6] Daisuke Takagi and Herbert E Huppert. Flow and instability of thin films on a cylinder and sphere. *Journal of fluid mechanics*, 647:221, 2010.
